# Supplementary material for: DRIFTS-MS Investigation of Low-Temperature CO Oxidation on Cu-Doped Manganese Oxide Prepared Using Nitrate Aerosol Decomposition
Source: MDPI journal article supplement (doi:10.3390/molecules28083511), 2023-04-16
Supplement: s1 [file s1]

# **Supplementary Materials for**

## **DRIFTS-MS Investigation of Low-Temperature CO Oxidation on Cu-Doped Manganese Oxide Prepared Using Nitrate Aerosol Decomposition**

**Xingfan Gong<sup>1</sup>, Jiacheng Xu<sup>1,2</sup>, Tiantian Zhang<sup>1</sup>, Yan Sun<sup>1</sup>, Shiyu Fang<sup>1</sup>, Ning Li<sup>1</sup>, Jiali Zhu<sup>1,3</sup>, Zuliang Wu<sup>1,3</sup>, Jing Li<sup>1,3</sup>, Erhao Gao<sup>1,3</sup>, Wei Wang<sup>1,3</sup>, Shuiliang Yao<sup>1,2,3,\*</sup>**

<sup>1</sup> School of Environmental Science and Engineering, Changzhou University, Changzhou 213164, China

<sup>2</sup> School of Material Science and Engineering, Changzhou University, Changzhou 213164, China

<sup>3</sup> Key Laboratory of Advanced Plasma Catalysis Engineering for China Petrochemical Industry, Changzhou 213164, China

\* Correspondence: yaos@cczu.edu.cn

**S1. Experimental system (Figure S1)**

**S2. Results (Figure S2-S5)**

## S1. Experimental system

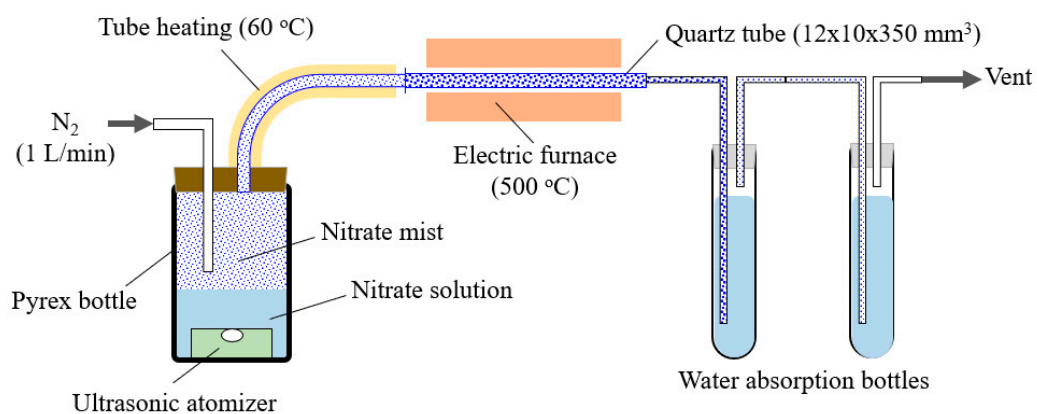

**Figure S1.** Diagram of catalyst preparation system.

## S2. Results

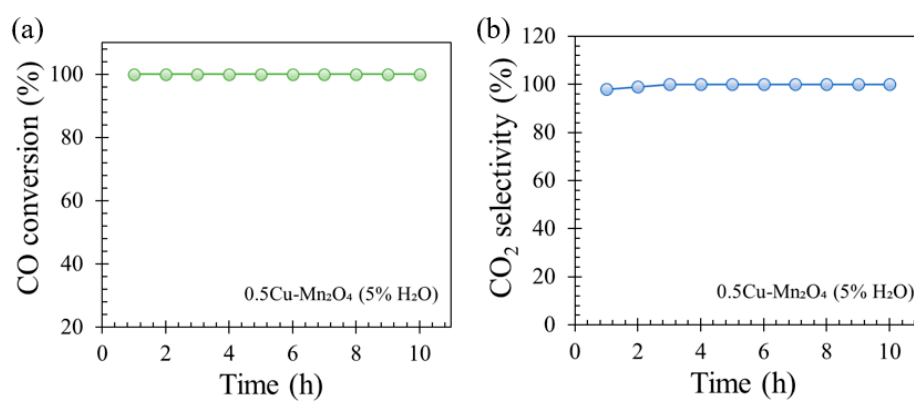

**Figure S2.** CO conversion (a) and  $CO_2$  selectivity (b) during 10-h CO oxidation on  $0.5Cu-Mn_2O_4$ .

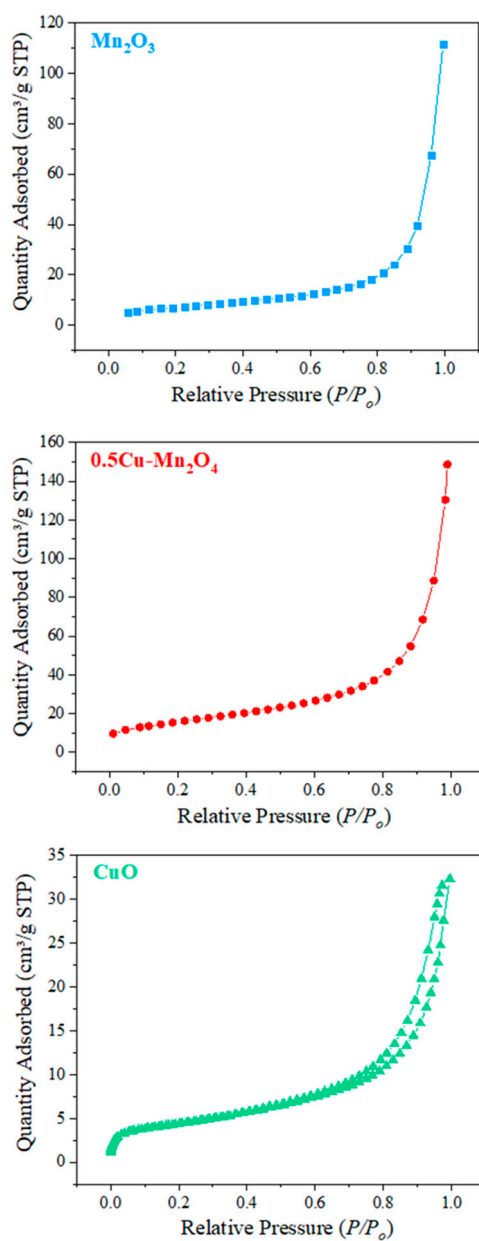

**Figure S3.**  $\text{N}_2$  adsorption isotherms of  $\text{Mn}_2\text{O}_3$ ,  $0.5\text{Cu-Mn}_2\text{O}_4$ , and  $\text{CuO}$ .

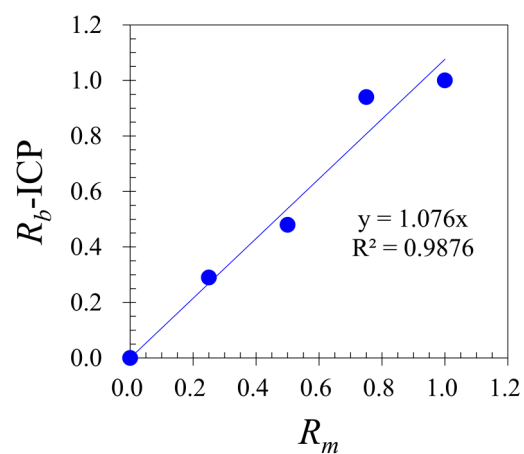

**Figure S4.** Relationship of atomic ratios of Cu/(Cu + Mn).

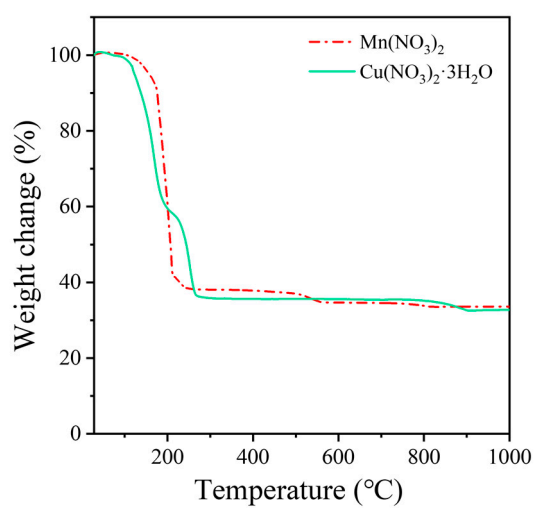

**Figure S5.** Decomposition profiles of  $\text{Mn}(\text{NO}_3)_2$  and  $\text{Cu}(\text{NO}_3)_2 \cdot \text{H}_2\text{O}$ .
